# Supplementary material for: Design of novolac resin-based network polymers for adsorptive removal of azo dye molecules
Source: Royal Society of Chemistry journal article supplement (doi:10.1039/c6ra01903j), 2016-01-01
Supplement: c6ra01903j1.pdf [file c6ra01903j1.pdf]

Supplementary data

## Design of novolac resin-based network polymers for adsorptive removal of azo dye molecules

Samaresh Ghosh\* and Mridula Acharyya

*Department of Chemistry, Bankura Sammilani College, Kenduadihi, Bankura, Pin-722102, India.*

*Email: gsamaresh@yahoo.com*

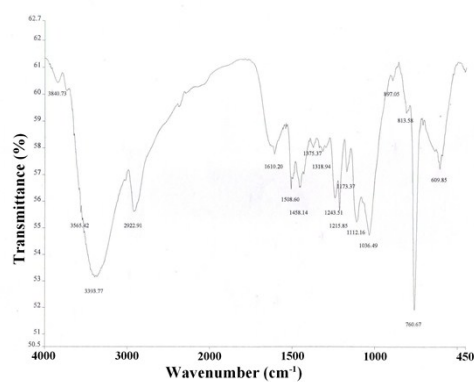

Figure 1s FTIR spectrum of 2

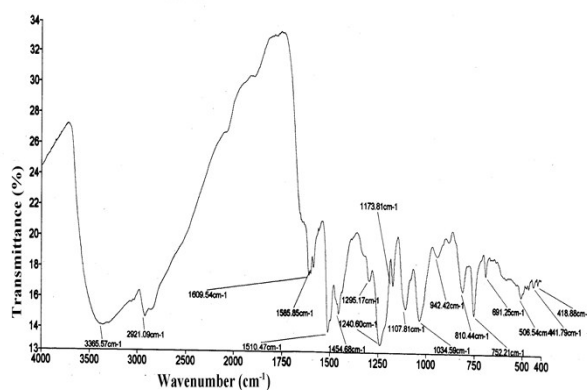

Figure 2s FTIR spectrum of 3

**Table 1s:** Thermal properties (TG/DTG) of **2** and **3**.

| Network Polymers | TG/DTG*          |          |                  |                |               |                      |
|------------------|------------------|----------|------------------|----------------|---------------|----------------------|
|                  | $T_d^{5-8}$ (°C) | Stage    | Temp. range (°C) | $T_{max}$ (°C) | Weight loss % | $Y_c$ at 600°C (wt%) |
| <b>2</b>         | <b>267</b>       | <b>1</b> | <b>267-369</b>   | <b>338</b>     | <b>47.69</b>  | <b>21</b>            |
|                  |                  | <b>2</b> | <b>369-455</b>   | <b>406</b>     | <b>43.51</b>  |                      |
| <b>3</b>         | <b>245</b>       | <b>1</b> | <b>245-384</b>   | <b>346</b>     | <b>43.59</b>  | <b>11</b>            |
|                  |                  | <b>2</b> | <b>384-482</b>   | <b>420</b>     | <b>40.61</b>  |                      |

\*TGA analysis was performed at a heating rate of 10°C/min under nitrogen flow (100 ml/min);  $T_d^{5-8}$ = Temperature at which 5-8 % weight loss occurred;  $T_{max}$ = maximum rate of weight loss;  $Y_c$  = char yield.

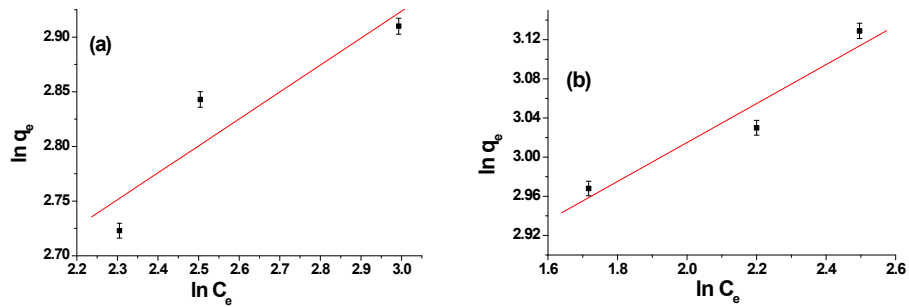

**Figure 3s** Freundlich isotherms for the adsorption of MO onto **3** at (a) pH 2.30 and (b) pH 7.0 at 25°C

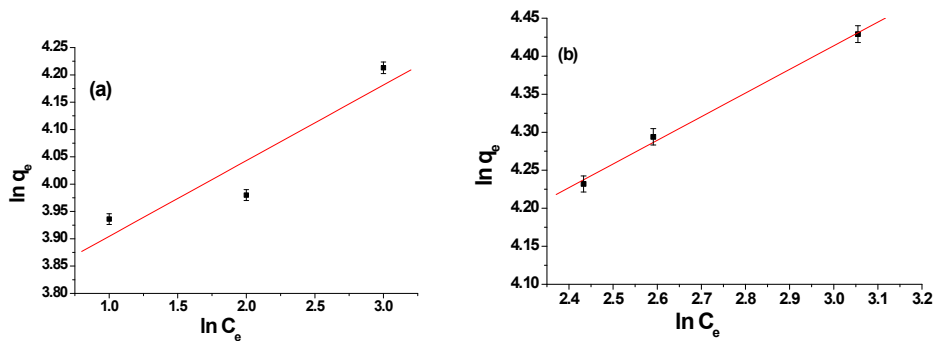

**Figure 4s** Freundlich isotherms for the adsorption of OG onto **2** at (a) pH 2.30 and (b) pH 7.0 at 25°C

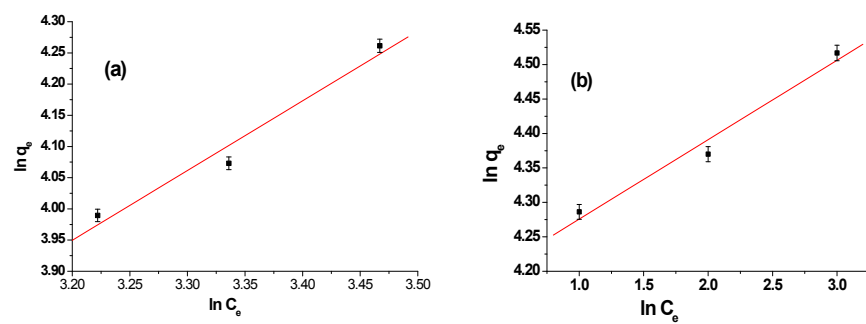

**Figure 5s** Freundlich isotherms for the adsorption of OG onto **3** at (a) pH 2.30 and (b) pH 7.0 at 25°C
